# Supplementary material
Source: PubMed Central journal article supplement (PMC3896160)
Supplement: 1316156111_pnas.201316156SI.pdf [file 1316156111_pnas.201316156SI.pdf]

# Supporting Information

Breuer et al. 10.1073/pnas.1316156111

## SI Text

**Calculation of Electronic Coupling Matrix Elements. Derivation of correction factor  $c_{\text{corr}}$ .** In the standard fragment-orbital density functional theory (FODFT) method for calculation of  $H_{\text{ab}}$ , the diabatic states are constructed by combining Kohn–Sham orbitals optimized for the two isolated monomer fragments in the gas phase (1, 2). Thus, spurious delocalization of the excess electron hole due to the electron delocalization error of standard exchange correlation functionals is avoided, but possible electronic polarization effects between the two monomers are missing. To estimate this contribution, coupling matrix elements obtained with FODFT were compared with values obtained with constrained density functional theory (CDFT) (3) as implemented in CPMD (1), where the diabatic states are constructed by optimizing the density for the dimer in the gas phase subject to a constraint on the charge difference between donor and acceptor.

We found that CDFT(PBE) optimizations (i.e., using the Perdew–Burke–Ernzerhof, or PBE, density functional) on the heme dimers taken from the protein structure resulted in relatively large spin leakage from the ferric to the ferrous heme. Although we have not investigated this problem further, it is likely that it can be cured by using CDFT with exact exchange functionals (4). Instead, we found that CDFT(PBE) calculations on a set of idealized dimer structures as used by Smith et al. (5) were straightforward and did not yield spurious spin delocalization. Hence, we used the five heme dimer structures of Smith et al. (5) at an Fe–Fe distance of 16.0 Å for the comparison between CDFT and FODFT calculations (Table S3). All calculations used the same electronic structure method as for the calculations on the heme pairs in the protein, i.e., PBE functional, a 130 Ryd plane wave cutoff, and Goedecker–Teter–Hutter pseudopotentials (semicore for Fe). We found that for each configuration, the ratio  $H_{\text{ab}}(\text{CDFT})/H_{\text{ab}}(\text{FODFT})$  lies close to their average of 1.75. The latter can be regarded as a correction factor for the missing electronic polarization between donor and acceptor in the FODFT calculations.

In the FODFT quantum mechanics/molecular mechanics (QM/MM) method, the calculation of  $H_{\text{ab}}$  is carried out similarly as above for the gas phase. The only difference is that the density of one monomer fragment is optimized in the static electrostatic field created by the force field charges of the other monomer fragment, the protein, and the solvent (the MM part). As mentioned in the main text, the effect of the MM part on the coupling values is negligibly small, not more than about 10%. This small effect probably means that the electronic polarization between donor and acceptor is not effectively mimicked by the charges of the MM fragment (a compensation between the latter and the protein/water seems unlikely). Thus, to account for the missing electronic polarization effects between the two fragments, we opted to apply the same correction factor as obtained from the gas-phase calculations above, i.e., the  $H_{\text{ab}}(\text{FODFT})$  values obtained from QM/MM are multiplied by  $c_{\text{corr}} = \langle H_{\text{ab}}(\text{CDFT})/H_{\text{ab}}(\text{FODFT}) \rangle = 1.75$  as indicated in Eq. 2. Table S1 summarizes the corrected FODFT QM/MM  $H_{\text{ab}}$  values for the heme pairs in the crystal structure and averaged over molecular dynamics (MD) trajectories. The latter were used for the calculation of electron transfer (ET) rates.

**Impact of functional on FODFT couplings.** To check whether the particular choice of the generalized gradient approximation functional had any impact on the coupling matrix elements, we also calculated FODFT couplings for the five test dimers above using the BLYP functional (i.e., Becke exchange part, Lee–Yang–Parr

correlation part) instead of PBE. The numbers obtained were virtually identical. To check whether exact exchange was relevant to FODFT couplings between the protein cofactors, PBE and PBE0 were compared for the nine heme pairs in the crystal structure of MtrF (at a lower plane wave cutoff of 90 Ryd to keep the exact exchange calculations feasible and in the gas phase). As shown in Table S4, for the majority of pairs, the difference between PBE and PBE0 is relatively small. The average change from PBE to PBE0 is around 10%; although individual changes are larger, if they average out to a small global change here then something similar could be expected for the ensemble averages to be calculated from the snapshots extracted from MD. It was hence concluded that exact exchange effects could be neglected in calculating the FODFT ensemble averages  $\langle |H_{\text{ab}}|^2 \rangle$ .

**Electronic Coupling Decay: Edge-to-Edge vs. Fe–Fe Distance Metric.** In addition to the edge-to-edge distance metric used in Fig. 2, we also determined the coupling decay with respect to the Fe–Fe distance (Fig. S2). For the T-shaped and coplanar pairs, this yields a decay constant  $\beta = 0.6 \text{ \AA}^{-1}$  ( $R^2 = 0.79$ ), similar to the  $0.8 \text{ \AA}^{-1}$  ( $R^2 = 0.85$ ) for edge-to-edge distance owing to the fact that both distances increase in the same way (the Fe–Fe distance increases by about 1 Å for every 1-Å increase in the edge-to-edge distance). For the stacked pairs, however, the Fe–Fe distance yields a lower decay constant:  $\beta = 1.05 \text{ \AA}^{-1}$  ( $R^2 = 0.96$ ) compared with  $2.25 \text{ \AA}^{-1}$  ( $R^2 = 0.9997$ ) for edge-to-edge distance. This decrease in  $\beta$  can be rationalized by the fact that for the stacked pairs, the Fe–Fe distance increases about twice as fast as the edge-to-edge distance (i.e., for an edge-to-edge distance increase of 1 Å the Fe–Fe distance increases by around 2 Å) so that the distance decay is just about half as strong. A global fit would yield a decay constant of  $\beta = 1.30 \text{ \AA}^{-1}$  ( $R^2 = 0.90$ ) compared with  $\beta = 1.65 \text{ \AA}^{-1}$  ( $R^2 = 0.91$ ) for edge-to-edge, but the two individual fits describe the individual bin points better as measured by average absolute differences between bin points and regression. Thus, the two metrics give a similar description for coplanar and the T-shaped motifs, but the edge-to-edge distance metric is clearly superior for stacked pairs ( $R^2$  very close to 1). The latter metric's better performance stems from the fact that, according to DFT calculations, the atoms of the macrocycles contribute to the electron mediating molecular orbitals with their  $p_z$  atomic orbitals (Fig. 1C) and one can expect that the overlap between these  $p_z$  atomic orbitals determines to a large extent the total electronic coupling.

**Analytical Model Describing Electron Flux Through MtrF.** We derive an analytical function for the electron flux  $J$  as a function of  $k_{\text{out}}$  (Fig. 4) by coarse graining the states of the system. We assume that electron transport in MtrF can be modeled by four distinct sites A to D: site A corresponds to an external donor injecting electrons into the protein; site B denotes the protein electron entrance site; site C represents the protein electron egress site; and site D denotes an external electron acceptor. The kinetics is then described by the following scheme:

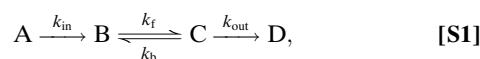

where electron injection into the protein (A to B) and ejection from the protein (C to D) is considered irreversible as can be assumed to be the case in the experiments of White et al. (6). The complicated kinetics of electron flux through the protein is condensed into one effective forward and backward rate constant  $k_{\text{f}}$

and  $k_b$ , respectively. Under steady-state conditions, the net flux  $J$  between any two adjacent sites is equal

$$J = k_{in}(1 - P_B) = k_f P_B(1 - P_C) - k_b(1 - P_B)P_C = k_{out}P_C, \quad [S2]$$

where  $P_B$  and  $P_C$  denote populations in the interval  $[0, 1]$ . The populations of A and D are assumed to be 1 and 0 at all times, i.e., the electron donor is in excess concentrations and the electron on the acceptor is immediately removed from equilibrium. Hence these populations do not appear in the expression for the flux. The factors  $(1 - P_B)$  and  $(1 - P_C)$  account for the fact that sites B and C can only be occupied by at most one single electron. We thus have two equations for the two unknowns  $P_B$  and  $P_C$ . Solving for  $P_B$  in terms of  $P_C$  and reinserting to solve for  $P_C$  yields the equation

$$P_C = \left( \frac{k_f}{k_{in}} - \frac{k_b}{k_{in}} \right) P_C^2 - \left( \frac{k_f}{k_{in}} + \frac{k_f}{k_{out}} \right) P_C + \frac{k_f}{k_{out}}. \quad [S3]$$

In the limit of high electron injection rates,  $k_{in} \gg k_f, k_b$ , Eq. S3 reduces to the simple expression

$$P_C = \frac{k_f}{k_f + k_{out}}. \quad [S4]$$

Insertion of Eq. S4 in the last identity of Eq. S2 gives

$$J = \frac{k_f}{1 + \frac{k_f}{k_{out}}}. \quad [S5]$$

Thus, for high injection rates, the flux through the protein depends only on the effective forward rate  $k_f$  and the ejection rate  $k_{out}$ . Furthermore, if we take the limit  $k_{out} \rightarrow \infty$ ,  $J$  becomes equal to  $k_f$ . The latter in fact represents the maximal possible flux  $J_{max}$  through the protein. We can therefore rewrite Eq. S5 as

$$J = \frac{J_{max}}{1 + \frac{J_{max}}{k_{out}}}. \quad [S6]$$

Fig. S3 shows the curves for  $J$  vs.  $k_{out}$  along the octa-heme chain of MtrF in the  $10 \rightarrow 5$  and  $5 \rightarrow 10$  direction as obtained by solving the master equation for the full problem (solid lines). Fits to Eq. S6 (dash-dotted lines) match the respective data very well, with values  $J_{max} = 1.57 \times 10^4$  for the forward and  $J_{max} = 1.06 \times 10^4$  for the backward direction. Thus, the full kinetic problem can be successfully mapped on the coarse four-state model in Eq. S1.

**Modeling of Electron Flux Through MtrCAB.** In the following, we try to model electron flux through the multiheme protein complex MtrCAB, i.e., the transmembrane complex assembled in a proteoliposome by White et al. (6), where electrons are transported from liposome-contained methyl viologen via MtrCAB to external iron oxides. MtrA is known to be a deca-heme cytochrome (7), whereas MtrB is a membrane pore protein proposed to enable close contact between MtrA and MtrC (8). We thus need a model and ET parameters for MtrC, MtrA, and the contact between them. For MtrC, we use our ET parameters for MtrF motivated by the homology model of ref. 9, and we assume electron transport along the octa-heme chain from heme 10 to heme 5 (egress site). The structure of MtrA is not known; however, the heme-binding motifs in its N-terminal half can be sequence-aligned with the penta-heme cytochrome NrfB (10), and MtrA has been found to be of a rod-like shape of around 100 Å length (11). We therefore decided to model MtrA as a NrfB

head-to-tail homodimer. We can then use our regressions for the two coupling regimes in Fig. 2 to estimate approximate couplings for the heme pairs in the crystal structure of NrfB (12), as well as for the contact between the two NrfB subunits on the one hand and between NrfB and MtrC/F on the other hand (by some crude manual docking of protein structures that should suffice for this modeling). In regard to reorganization free energies, the most significant difference should occur between heme pairs located in the solvent-exposed part of MtrA and those located within the membrane-buried part making contact to MtrC. With a membrane thickness of around 40–50 Å (6), MtrA should be roughly half-buried into the membrane, with the other half exposed into the periplasm. Thus, for the first five heme pairs (as well as the final MtrA-MtrC contact), we assume a reorganization free energy  $\lambda$  of 0.9 eV (i.e., a typical number for MtrF), whereas for the four remaining membrane-buried pairs, we assume 0.57 eV, the reorganization energy previously obtained (13) for heme  $a$  to heme  $a_3$  ET in membrane-embedded cytochrome  $c$  oxidase. The final set of parameters to be estimated are then the driving forces of each ET step. Although the overall electrochemical response of MtrA has been studied (8), redox potentials of individual cofactors are not known. A crude fit to the voltammogram in Hartshorne et al. (8) yields a set of 10 distinct redox potentials, however, that enable to estimate minimal and maximal flux through MtrCAB within the model described thus far, by assigning redox potentials to the 10 cofactors of MtrA to either yield the smallest possible or highest possible rate-limiting single ET rate. We thereby obtain the two curves in Fig. S4, delimiting upper and lower limits for the flux through MtrCAB based on our model. As can be seen, depending on the combination of parameters the flux through MtrCAB could reach the same level as for MtrF itself (maximal flux for flux-maximizing parameters, black curve:  $14,300 \text{ s}^{-1}$ ); it could also be one order of magnitude smaller than for MtrF (maximal flux for flux-minimizing parameters, blue curve:  $800 \text{ s}^{-1}$ ), but this is rather unlikely as it requires the steepest possible free energy uphill step to have a small electronic coupling and a high reorganization energy.

**Current-Voltage Response of MtrF in Solution and in Air. Modeling of current-voltage response.** Pioneering measurements using an atomic force microscopy tip and a gold electrode revealed that bacterial pili can support very high currents of several nano-Ampere at moderate voltages (14, 15). It is generally thought that the conduction along pili is facilitated by multiheme proteins, and that when a multiheme protein is sandwiched between two electrodes, the conduction occurs via electron hopping along the heme groups (16, 17). Here we would like to investigate if the hopping mechanism can account for the observed nano-Ampere currents when the ET parameters are used that are reported in our current and previous works. To this end, we model the current-voltage response of a single MtrF protein placed between two electrodes with potential difference  $V$  by solving a master equation similarly as described in the main text (see below for details), but with the vital difference that the driving force for heme-heme ET is gradually decreased by  $eV/(n + 1)$  as the electrode potential difference is stepped up ( $e$  is the unit charge and  $n$  the number of hemes between the left and the right electrodes).

The current-voltage characteristic obtained for the calculated ET parameters in solution is illustrated in Fig. S5 (black lines). Two different regimes are shown depending on the ratio of heterogeneous input (=output) rate,  $k_{10,in} (=k_{5,out})$  and the smallest heme-heme ET rate,  $k_{ji}^{min}$  evaluated at zero potential bias,  $r = k_{10,in}/k_{ji}^{min}$ . The current shown in solid lines ( $r = 100$ ) is limited by ET through MtrF, and the current shown in dash dotted lines ( $r = 1$ ) is, where different from the solid line, limited by heterogeneous ET. We find that the increase in current is approximately linear at low voltages but sharply increases to a maximum at  $V \approx (n + 1)\lambda/e$  to decrease for higher voltages. The



- Oberhofer H, Blumberger J (2010) Electronic coupling matrix elements from charge constrained density functional theory calculations using a plane wave basis set. *J Chem Phys* 133(24):244105.
- Oberhofer H, Blumberger J (2012) Revisiting electronic couplings and incoherent hopping models for electron transport in crystalline C60 at ambient temperatures. *Phys Chem Chem Phys* 14(40):13846–13852.
- Wu Q, Van Voorhis T (2005) Direct optimization method to study constrained systems within density-functional theory. *Phys Rev A* 72(2):024502-1–024502-4.
- Blumberger J, McKenna KP (2013) Constrained density functional theory applied to electron tunnelling between defects in MgO. *Phys Chem Chem Phys* 15(6):2184–2196.
- Smith DMA, Rosso KM, Dupuis M, Valiev M, Straatsma TP (2006) Electronic coupling between heme electron-transfer centers and its decay with distance depends strongly on relative orientation. *J Phys Chem B* 110(31):15582–15588.
- White GF, et al. (2013) Rapid electron exchange between surface-exposed bacterial cytochromes and Fe(III) minerals. *Proc Natl Acad Sci USA* 110(16):6346–6351.
- Pitts KE, et al. (2003) Characterization of the *Shewanella oneidensis* MR-1 decaheme cytochrome MtrA: Expression in *Escherichia coli* confers the ability to reduce soluble Fe(III) chelates. *J Biol Chem* 278(30):27758–27765.
- Hartshorne RS, et al. (2009) Characterization of an electron conduit between bacteria and the extracellular environment. *Proc Natl Acad Sci USA* 106(52):22169–22174.
- Edwards MJ, Fredrickson JK, Zachara JM, Richardson DJ, Clarke TA (2012) Analysis of structural MtrC models based on homology with the crystal structure of MtrF. *Biochem Soc Trans* 40(6):1181–1185.
- Clarke TA, et al. (2008) The role of multihaem cytochromes in the respiration of nitrite in *Escherichia coli* and Fe(III) in *Shewanella oneidensis*. *Biochem Soc Trans* 36(Pt 5): 1005–1010.
- Firer-Sherwood MA, Ando N, Drennan CL, Elliott SJ (2011) Solution-based structural analysis of the decaheme cytochrome, MtrA, by small-angle X-ray scattering and analytical ultracentrifugation. *J Phys Chem B* 115(38):11208–11214.
- Clarke TA, Cole JA, Richardson DJ, Hemmings AM (2007) The crystal structure of the pentahaem c-type cytochrome NrfB and characterization of its solution-state interaction with the pentahaem nitrite reductase NrfA. *Biochem J* 406(1):19–30.
- Tipmanee V, Blumberger J (2012) Kinetics of the terminal electron transfer step in cytochrome c oxidase. *J Phys Chem B* 116(6):1876–1883.
- El-Naggar MY, et al. (2010) Electrical transport along bacterial nanowires from *Shewanella oneidensis* MR-1. *Proc Natl Acad Sci USA* 107(42):18127–18131.
- Gorby YA, et al. (2006) Electrically conductive bacterial nanowires produced by *Shewanella oneidensis* strain MR-1 and other microorganisms. *Proc Natl Acad Sci USA* 103(30):11358–11363.
- Polizzi NF, Skourtis SS, Beratan DN (2012) Physical constraints on charge transport through bacterial nanowires. *Faraday Discuss* 155:43–62, discussion 103–114.
- Pirbadian S, El-Naggar MY (2012) Multistep hopping and extracellular charge transfer in microbial redox chains. *Phys Chem Chem Phys* 14(40):13802–13808.
- Blumberger J, Klein ML (2006) Reorganization free energies for long-range electron transfer in a porphyrin-binding four-helix bundle protein. *J Am Chem Soc* 128(42): 13854–13867.
- Blumberger J (2008) Free energies for biological electron transfer from QM/MM calculation: Method, application and critical assessment. *Phys Chem Chem Phys* 10(37):5651–5667.
- Tipmanee V, Oberhofer H, Park M, Kim KS, Blumberger J (2010) Prediction of reorganization free energies for biological electron transfer: A comparative study of Ru-modified cytochromes and a 4-helix bundle protein. *J Am Chem Soc* 132(47):17032–17040.
- Migliore A, Nitzan A (2013) Irreversibility and hysteresis in redox molecular conduction junctions. *J Am Chem Soc* 135(25):9420–9432.
- Chidsey CED (1991) Free energy and temperature dependence of electron transfer at the metal-electrolyte interface. *Science* 251(4996):919–922.
- Bortolotti CA, et al. (2011) The reorganization energy in cytochrome c is controlled by the accessibility of the heme to the solvent. *J Phys Chem Lett* 2(14):1761–1765.

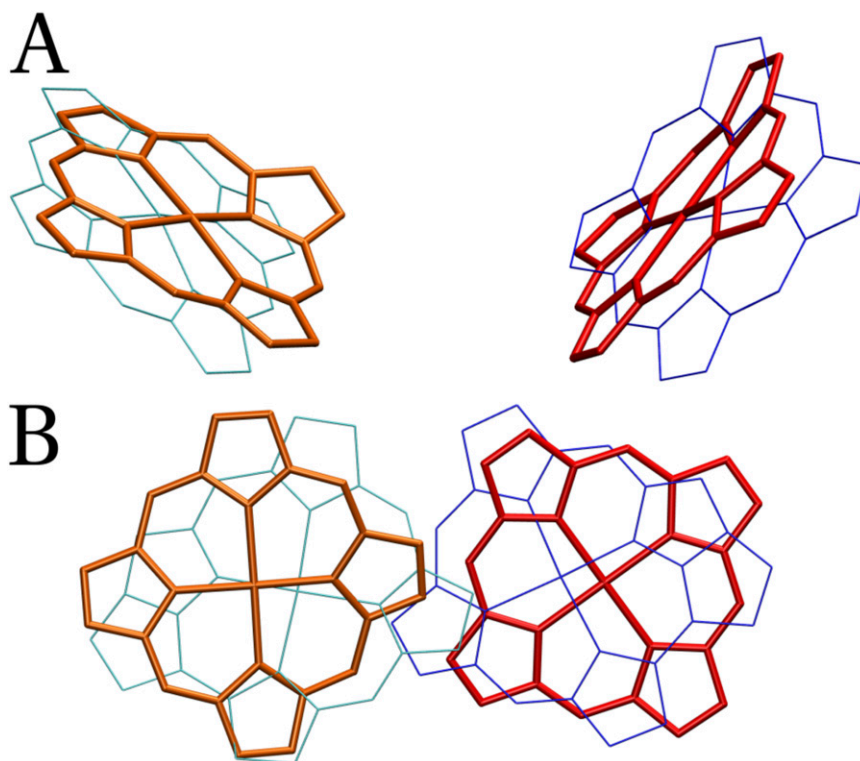

**Fig. S1.** Comparison of heme dimer motifs in MtrF with metal-containing porphyrin dimers in other ET-related proteins. (A) T-shaped pair 6–8 from MtrF (red/orange) vs. heme a-heme a<sub>3</sub> from cytochrome c oxidase [blue/cyan; Protein Databank (PDB) ID 1V54]. (B) Stacked pair 4–5 from MtrF (red/orange) vs. the chlorophyll-special pair from the photosynthetic reaction center from *Rh. sphaeroides* (blue/cyan; PDB ID 1M3X).

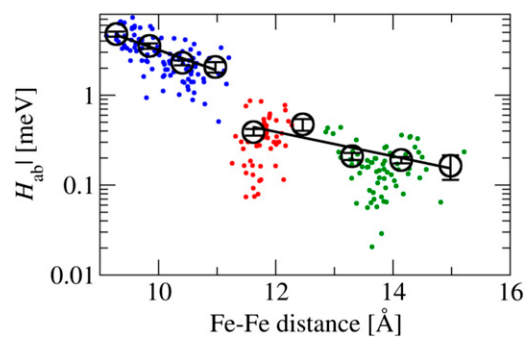

**Fig. S2.** Modulus of electronic coupling matrix elements ( $|H_{ab}|$ ) for ET between ferrous and ferric heme cofactors in MtrF as a function of the heme Fe-Fe distance. Data points and fits are obtained as explained in Fig. 2, and the same color code is used. Bin width for  $\langle |H_{ab}|^2 \rangle^{1/2}$  (circles) is 0.5625 (Left) and 0.7 Å (Right).

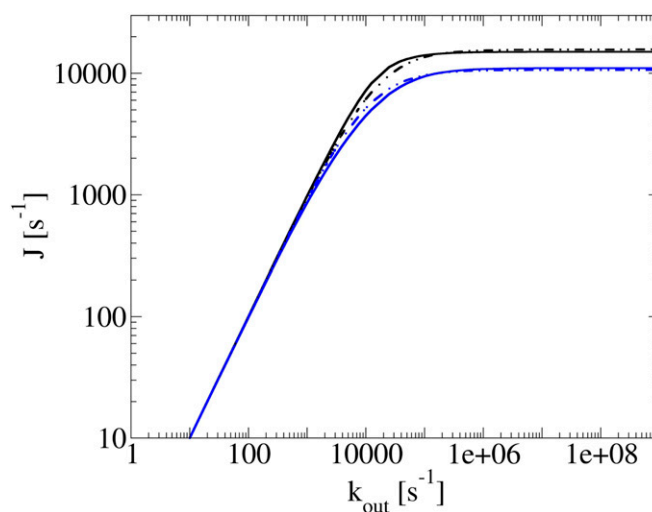

**Fig. S3.**  $J$  vs.  $k_{out}$  for electron flux along the octa-heme chain in MtrF in both directions (solid lines; black: forward/10  $\rightarrow$  5, blue: backward/5  $\rightarrow$  10), together with analytic fits to the numeric curves using Eq. S6 (broken lines).

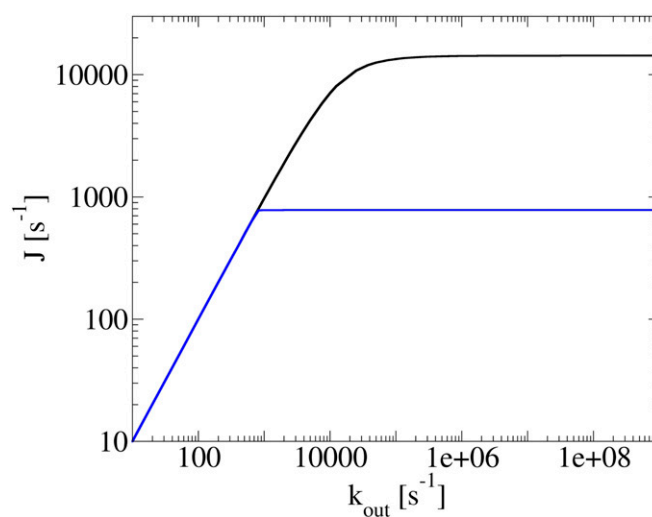

**Fig. S4.**  $J$  vs.  $k_{out}$  for electron flux through the protein complex MtrCAB (see text for model applied). Black curve: redox potentials in MtrA chosen to maximize flux; blue curve: redox potentials chosen to minimize flux.
